# Supplementary material for: An Anthocyanin-Rich Extract Obtained from Portuguese Blueberries Maintains Its Efficacy in Reducing Microglia-Driven Neuroinflammation after Simulated Digestion
Source: PubMed Central journal article supplement (PMC7761390; doi:10.3390/nu12123670), 2020-11-28
Supplement: nutrients-12-03670-s001.pdf [file nutrients-12-03670-s001.pdf]

# An Anthocyanin-Rich Extract Obtained from Portuguese Blueberries Maintains Its Efficacy in Reducing Microglia-Driven Neuroinflammation after Simulated Digestion

Diana Serra <sup>1,2,\*</sup>, Joana F. Henriques <sup>1,2</sup>, Teresa Serra <sup>3,4</sup>, Andreia Bento Silva <sup>5</sup>, Maria Rosário Bronze <sup>4,5</sup>, Teresa C. P. Dinis <sup>1,2</sup> and Leonor M. Almeida <sup>1,2</sup>

- <sup>1</sup> CNC—Center for Neuroscience and Cell Biology, 3000-504 Coimbra, Portugal; dianajserra@gmail.com (D.S.); joanafhenriques@gmail.com (J.F.H.); tcpdinis@ci.uc.pt (T.C.P.D.); malmeida@ci.uc.pt (L.M.A.)
- <sup>2</sup> Faculdade de Farmácia, Universidade de Coimbra, 3000-548 Coimbra, Portugal dianajserra@gmail.com (D.S.); joanafhenriques@gmail.com (J.F.H.); tcpdinis@ci.uc.pt (T.C.P.D.); malmeida@ci.uc.pt (L.M.A.)
- <sup>3</sup> IBET—Instituto de Biologia Experimental e Tecnológica, 2780-157 Oeiras, Portugal; tserra@ibet.com (T.S.)
- <sup>4</sup> ITQB—Instituto de Tecnologia Química e Biológica Antonio Xavier, Universidade Nova de Lisboa, 2780-157 Oeiras, Portugal; tserra@ibet.com (T.S.); mbronze@ibet.pt (M.R.B.)
- <sup>5</sup> Faculdade de Farmácia, Universidade de Lisboa, 1649-003 Lisboa, Portugal; abentosilva@ff.ulisboa.pt (A.B.S.); mbronze@ibet.pt (M.R.B.)

\* Correspondence: dianajserra@gmail.com (D.S.); Tel.: +351-239-488-400; Fax: +351-239-488-503

## Supplementary information:

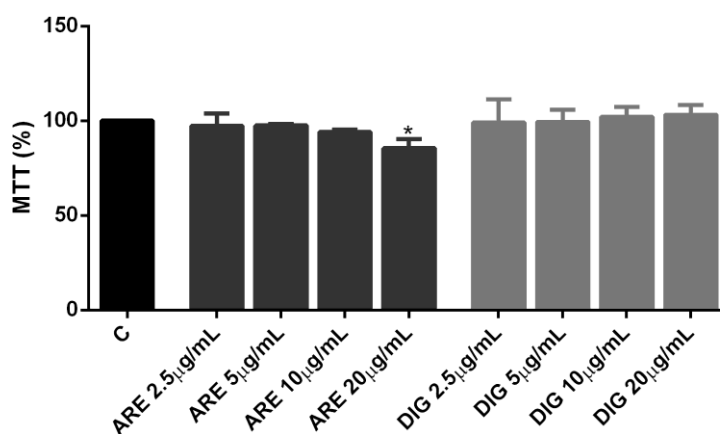

**Supplementary figure.** Effects of the original extract of Portuguese blueberries (ARE) and of the digested fraction (DIG) on cell viability of N9 cells. Cells were pre-incubated with 2.5, 5 and 10 µg/mL ARE or 2.5, 5 and 10 µg/mL DIG for 24 hours. Cell viability was assessed by MTT test as described in “Materials and Methods and determined as percentage of control cells. Values are mean ± SEM of at least three different experiments, in duplicate. \* $p < 0.05$  vs Control.
